# Supplementary material for: Designing multifunctional 3D magnetic foam for effective insoluble oil separation and rapid selective dye removal for use in wastewater remediation
Source: Royal Society of Chemistry journal article supplement (doi:10.1039/c6ta11252h), 2017-01-01
Supplement: c6ta11252h2.pdf [file c6ta11252h2.pdf]

## Supporting Information

### **Designing Multifunctional 3D Magnetic Foam for Effective Insoluble Oils Separation and Rapid Selective Dye Removal towards Wastewater Remediation**

Yanqiu Zhang, Xiaobin Yang, Zhengxing Wang, Jun Long and Lu Shao□

MIT key Laboratory of Critical Materials Technology for New Energy Conversion and Storage, School of Chemical Engineering and Technology, State Key Laboratory of Urban Water Resource and Environment (SKLUWRE), Harbin Institute of Technology, Harbin 150001, PR China

\* E-mail address of corresponding author:

\*Prof. L. Shao      E-mail: [shaolu@hit.edu.cn](mailto:shaolu@hit.edu.cn)

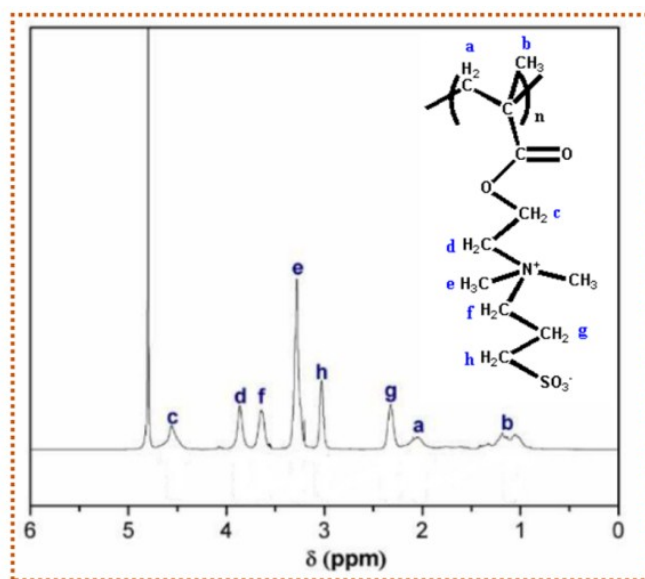

**Fig. S1**  $^1\text{H}$  NMR of PSBMA

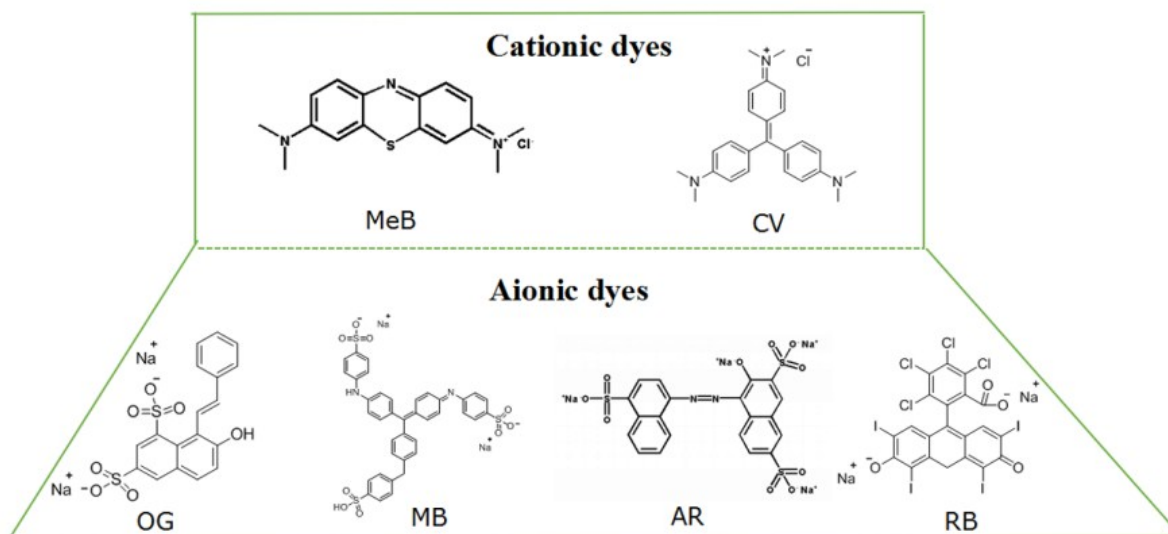

**Fig. S2** Molecular structures of the anionic dyes (MB, RB, AF and OG) and cationic dyes (MeB and CV).

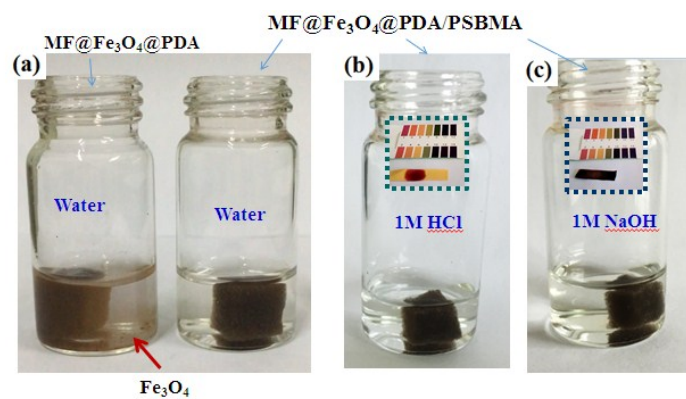

**Fig. S3** Immersing MF@Fe<sub>3</sub>O<sub>4</sub>@PDA and MF@Fe<sub>3</sub>O<sub>4</sub>@PDA/PSBMA foams in water (a); Immersing MF@Fe<sub>3</sub>O<sub>4</sub>@PDA/PSBMA foam in 1M HCl(b) and NaOH(c) aqueous up to 24 h.

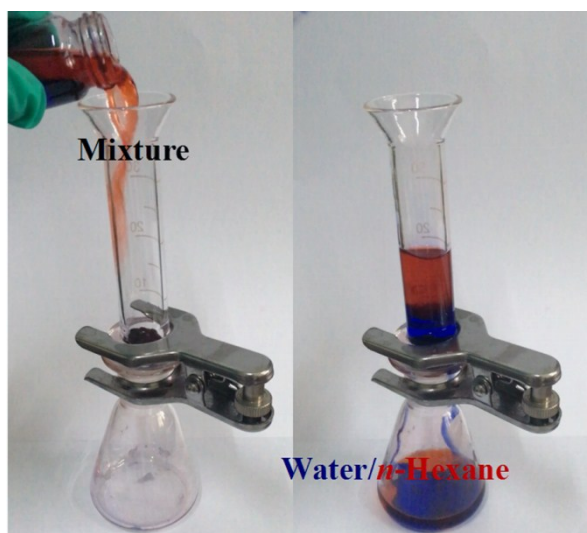

**Fig. S4** Separation of n-hexane-water mixtures of MF@Fe<sub>3</sub>O<sub>4</sub>@PDA.

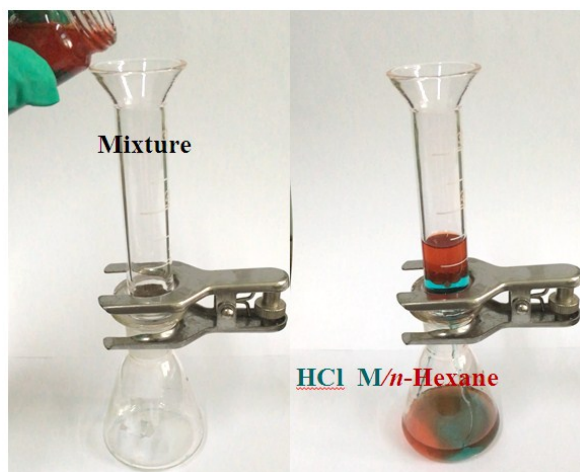

**Fig. S5** Separation experiments of the MF@Fe<sub>3</sub>O<sub>4</sub>@PDA foam for mixtures of n-hexane and 1 M HCl.

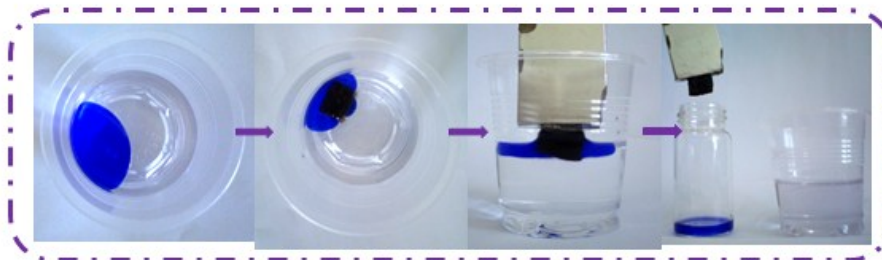

**Fig. S6** Photographs of the selective absorption of water (dyed with MB) from oil

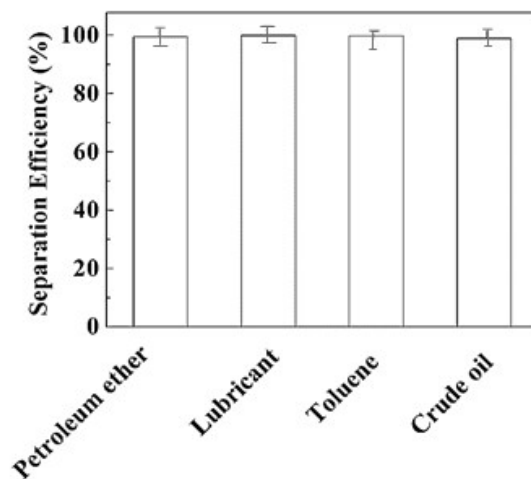

**Fig. S7** The separation efficiency of different oil (Petroleum ether, Lubricant, Toluene and Crude oil) and water emulsions in 1:30 (v/v).

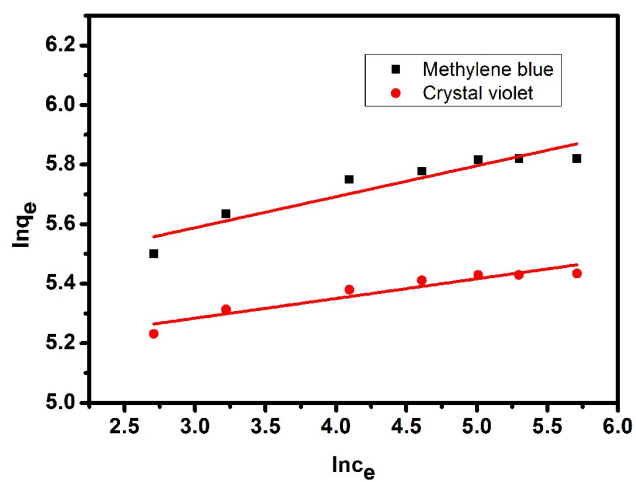

**Fig. S8** Adsorption isotherms of Methylene blue and Crystal violet adsorption on MF@Fe<sub>3</sub>O<sub>4</sub>@PDA/PSBMA at pH = 7 fitting curves of the Freundlich isotherm model.

**Table S1** The  $q_{\max}$  for the adsorption of Methylene blue on various adsorbents.

| Adsorbents                                                                     | $q_{\max}$ (mg g <sup>-1</sup> ) | Ref.      |
|--------------------------------------------------------------------------------|----------------------------------|-----------|
| Magnetic nanoparticles (Fe <sub>3</sub> O <sub>4</sub> /PDA)                   | 204.1                            | 43        |
| Magnetic polypyrrole nanocomposite (Fe <sub>3</sub> O <sub>4</sub> @PPy/RGO)   | 270.3                            | 44        |
| Polydopamine microspheres                                                      | 90.7                             | 45        |
| Magnetic Ni/carbon (Ni/C) nanomaterials                                        | 175.2                            | 46        |
| Graphene nanosheet (GNS)/magnetite (Fe <sub>3</sub> O <sub>4</sub> ) Composite | 43.8                             | 47        |
| PDA-coated silica gels                                                         | 62.5                             | 48        |
| Graphene-carbon nanotube                                                       | 65.8                             | 49        |
| Magnetic MF@Fe <sub>3</sub> O <sub>4</sub> @PDA/PSBMA foam                     | 336.1                            | This work |

**Table S2** The element content of the MF@Fe<sub>3</sub>O<sub>4</sub>@PDA/PSBMA before and after absorption Methylene blue

| Sample                           | C1s(%) | N1s(%) | O1s(%) | S2p (%) |
|----------------------------------|--------|--------|--------|---------|
| before absorption methylene blue | 74.4   | 4.2    | 19.8   | 1.6     |
| after absorption methylene blue  | 80.1   | 0.4    | 19.3   | 0.1     |
